# Supplementary material
Source: PubMed Central journal article supplement (PMC4249405)
Supplement: AAC.03246-14_zac011143356so1.pdf [file AAC.03246-14_zac011143356so1.pdf]

**Supplementary Table S1a.** Parameter estimates including precision (RSE) for study C110 (bedaquiline drug-drug interaction with ritonavir-boosted lopinavir)<sup>a</sup>

| <b>Study C110</b>                |                    |                                |                          |
|----------------------------------|--------------------|--------------------------------|--------------------------|
| <b>Fixed effects<sup>b</sup></b> | <b>Value (RSE)</b> | <b>Random Effects</b>          | <b>Value [CV%] (RSE)</b> |
| MTT [h]                          | 1.02 (18.6%)       | BOV F                          | 13.4 (28.6%)             |
| NN [-]                           | 5.77 (41.8%)       | BSV F                          | 9.40 (60.0%)             |
| KA [1/h]                         | 0.0983 (11.2%)     | BOV MTT                        | 71.1 (20.1%)             |
| CL/F [L/h]                       | 3.09 (17.3%)       | BSV CL                         | 39.2 (18.3%)             |
| V/F [L]                          | 16.1 (22.8%)       | BSV CLM2                       | 40.5 (20.5%)             |
| Q1/F [L/h]                       | 5.97 (4.6%)        | BSV CL~BSV CLM2 <sup>c</sup>   | 77.4 (23.6%)             |
| VP1/F [L]                        | 4890 (17%)         | BSV EFF1, scaled BSV EFF2      | 34.6 (17.2%)             |
| Q2/F [L/h]                       | 3.52 (9.3%)        | BSV V                          | 47.5 (18.9%)             |
| VP2/F [L]                        | 174 (27.2%)        | BSV Q1                         | 14.0 (30.7%)             |
| CLM2/F/fm [L/h]                  | 14.6 (16.6%)       | BSV VM2                        | 52.0 (20.6%)             |
| VM2/F/fm [L]                     | 746 (25.1%)        | BSV VP1M2                      | 38.5 (40.5%)             |
| Q1M2/F/fm [L/h]                  | 75.5 (17.7%)       |                                |                          |
| VP1M2/F/fm [L]                   | 3140 (19.5%)       | Prop error TMC                 | 17.1 (6.9%)              |
| EFF1 LPV/r BDQ CL                | 0.347 (9.3%)       | Prop error M2                  | 14.5 (6.7%)              |
| EFF2 LPV/r M2 CL                 | 0.578 (8.7%)       | Error correlation <sup>c</sup> | 54.3 (12.2%)             |
| Error wt TAD < 6 h               | 1.89 (7%)          |                                |                          |
| Scale ETA EFF M2 CL              | 0.335 (84.5%)      |                                |                          |

<sup>a</sup> Abbreviations: MTT, mean transit time; NN, number of transit compartments; KA, absorption rate constant; F, bioavailability; CL, clearance, V, volume of distribution; Q, intercompartmental clearance; VP, volume of distribution of peripheral compartments; fm, fraction BDQ metabolized to M2; EFF, interaction effect; TAD, time after dose; BOV, between-occasion variability; BSV, between-subject variability; Prop, proportional; RSE, relative standard error; CV%, percent coefficient of variation.

<sup>b</sup> Disposition parameters for a typical individual of 70 kg, allometric scaling with body weight and fixed coefficients 0.75 for CL and 1 for V applied

<sup>c</sup> Correlation between errors for BDQ and M2

**Supplementary Table S1b.** Parameter estimates including precision (RSE) for study C117 (bedaquiline drug-drug interaction with nevirapine)<sup>a</sup>

| <b>Study C117</b>                |                    |                                |                          |
|----------------------------------|--------------------|--------------------------------|--------------------------|
| <b>Fixed effects<sup>b</sup></b> | <b>Value (RSE)</b> | <b>Random Effects</b>          | <b>Value [CV%] (RSE)</b> |
| MTT [h]                          | 3.37 (7.7%)        | BOV F                          | 22.6 (35.1%)             |
| NN                               | 4.48 (9.3%)        | BSV F                          | 20.5 (37.5%)             |
| KA [h <sup>-1</sup> ]            | 0.131 (9.8%)       | BOV MTT                        | 32.9 (13.1%)             |
| CL/F [L/h]                       | 3.34 (9.5%)        | BSV CL                         | 20.4 (18.0%)             |
| V/F [L]                          | 11.2 (42.0%)       | BSV CLM2                       | 22.6 (19.2%)             |
| Q1/F [L/h]                       | 7.03 (8.3%)        | BSV CL~BSV CLM2 <sup>c</sup>   | 24.2 (56.7%)             |
| VP1/F [L]                        | 4000 (11.4%)       | BSV V                          | 98.0 (35.8%)             |
| Q2/F [L/h]                       | 5.26 (19.2%)       | BSV Q1                         | 17.7 (20.9%)             |
| VP2/F [L]                        | 164 (8.2%)         | BSV VM2                        | 9.43 (152%)              |
| CLM2/F/fm [L/h]                  | 16.0 (9.9%)        | BSV VP1M2                      | 9.90 (75.8%)             |
| VM2/F/fm [L]                     | 824 (10.5%)        |                                |                          |
| Q1M2/F/fm [L/h]                  | 131 (11.4%)        | Prop error TMC                 | 22.7 (8.4%)              |
| VP1M2/F/fm [L]                   | 3090 (8.3%)        | Prop error M2                  | 16.2 (9.0%)              |
| EFF NVP on BDQ CL                | 0.915 (5.9%)       | Error correlation <sup>c</sup> | 54.2 (10.9%)             |
| EFF NVP on M2 CL                 | 1.05 (10.3%)       |                                |                          |
| Error wt TAD < 6 h               | 2.42 (9.3%)        |                                |                          |

<sup>a</sup> Abbreviations: MTT, mean transit time; NN, number of transit compartments; KA, absorption rate constant; F, bioavailability; CL, clearance, V, volume of distribution; Q, intercompartmental clearance; VP, volume of distribution of peripheral compartments; fm, fraction BDQ metabolized to M2; EFF, interaction effect; TAD, time after dose; BOV, between-occasion variability; BSV, between-subject variability; Prop, proportional; RSE, relative standard error; CV%, percent coefficient of variation.

<sup>b</sup> Disposition parameters for a typical individual of 70 kg, allometric scaling with body weight and fixed coefficients 0.75 for CL and 1 for V applied

<sup>c</sup> Correlation between errors for BDQ and M2

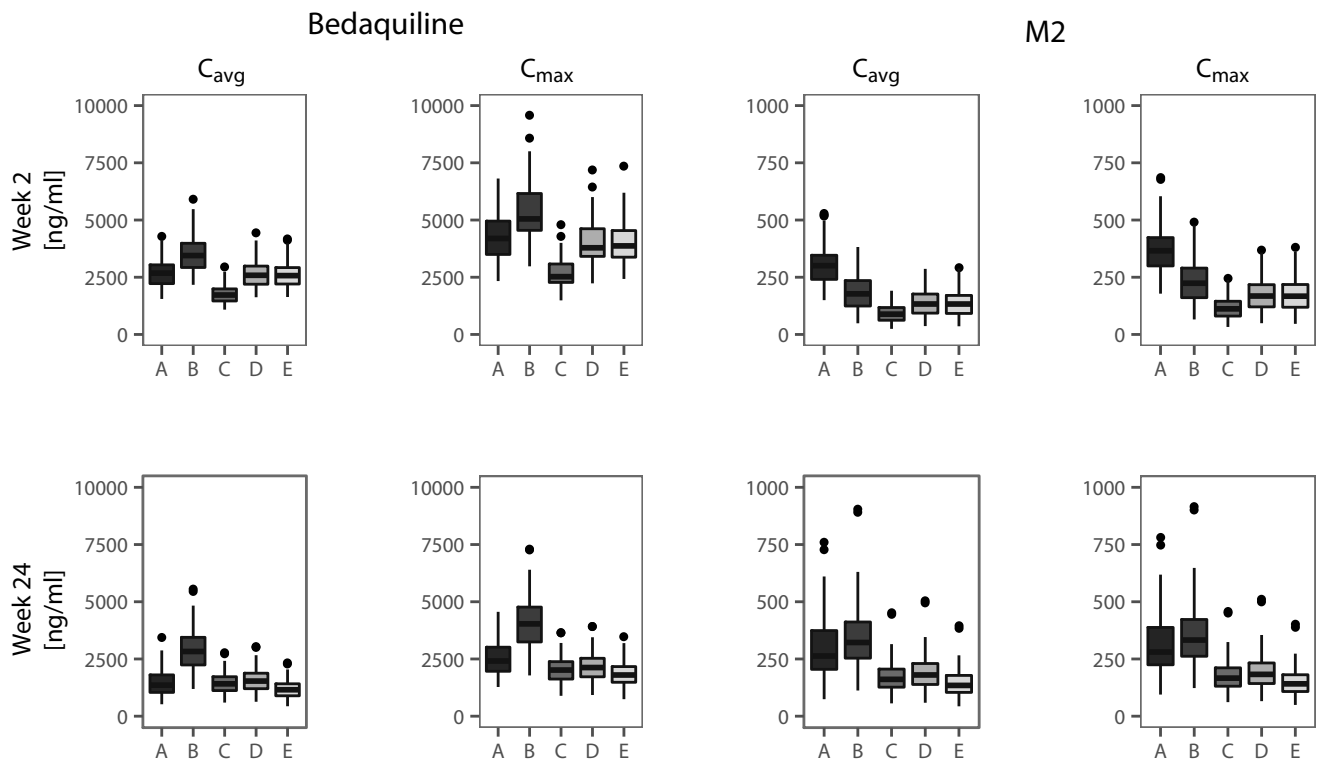

**Supplementary Figure S2.** Simulation results presented as average concentrations (C<sub>avg</sub>) and maximum concentrations (C<sub>max</sub>) of bedaquiline and its M2 metabolite during weeks 2 and 24 of treatment with bedaquiline administered alone or together with ritonavir-boosted lopinavir (400/100 mg dosed twice daily) for the full 6 months of TB treatment (Scenario 1).

A = 2 weeks 400mg daily, then 22 weeks 200mg thrice-weekly (no LPV/r)

B = 2 weeks 400mg daily, then 22 weeks 200mg thrice-weekly (with LPV/r)

C = 2 weeks 200mg daily, then 22 weeks 100mg thrice-weekly (with LPV/r)

D = 2 weeks 300mg daily, then 22 weeks 100mg thrice-weekly (with LPV/r)

E = 2 weeks 300mg daily, then 22 weeks 100mg twice-weekly (with LPV/r)
